# Supplementary material
Source: Springer Nature journal article supplement (https://www.springermedizin.de/resource/supplementary/12963_2011_185_MOESM4_ESM.pdf/9572316)

# Component Model Rankings Across Holdouts

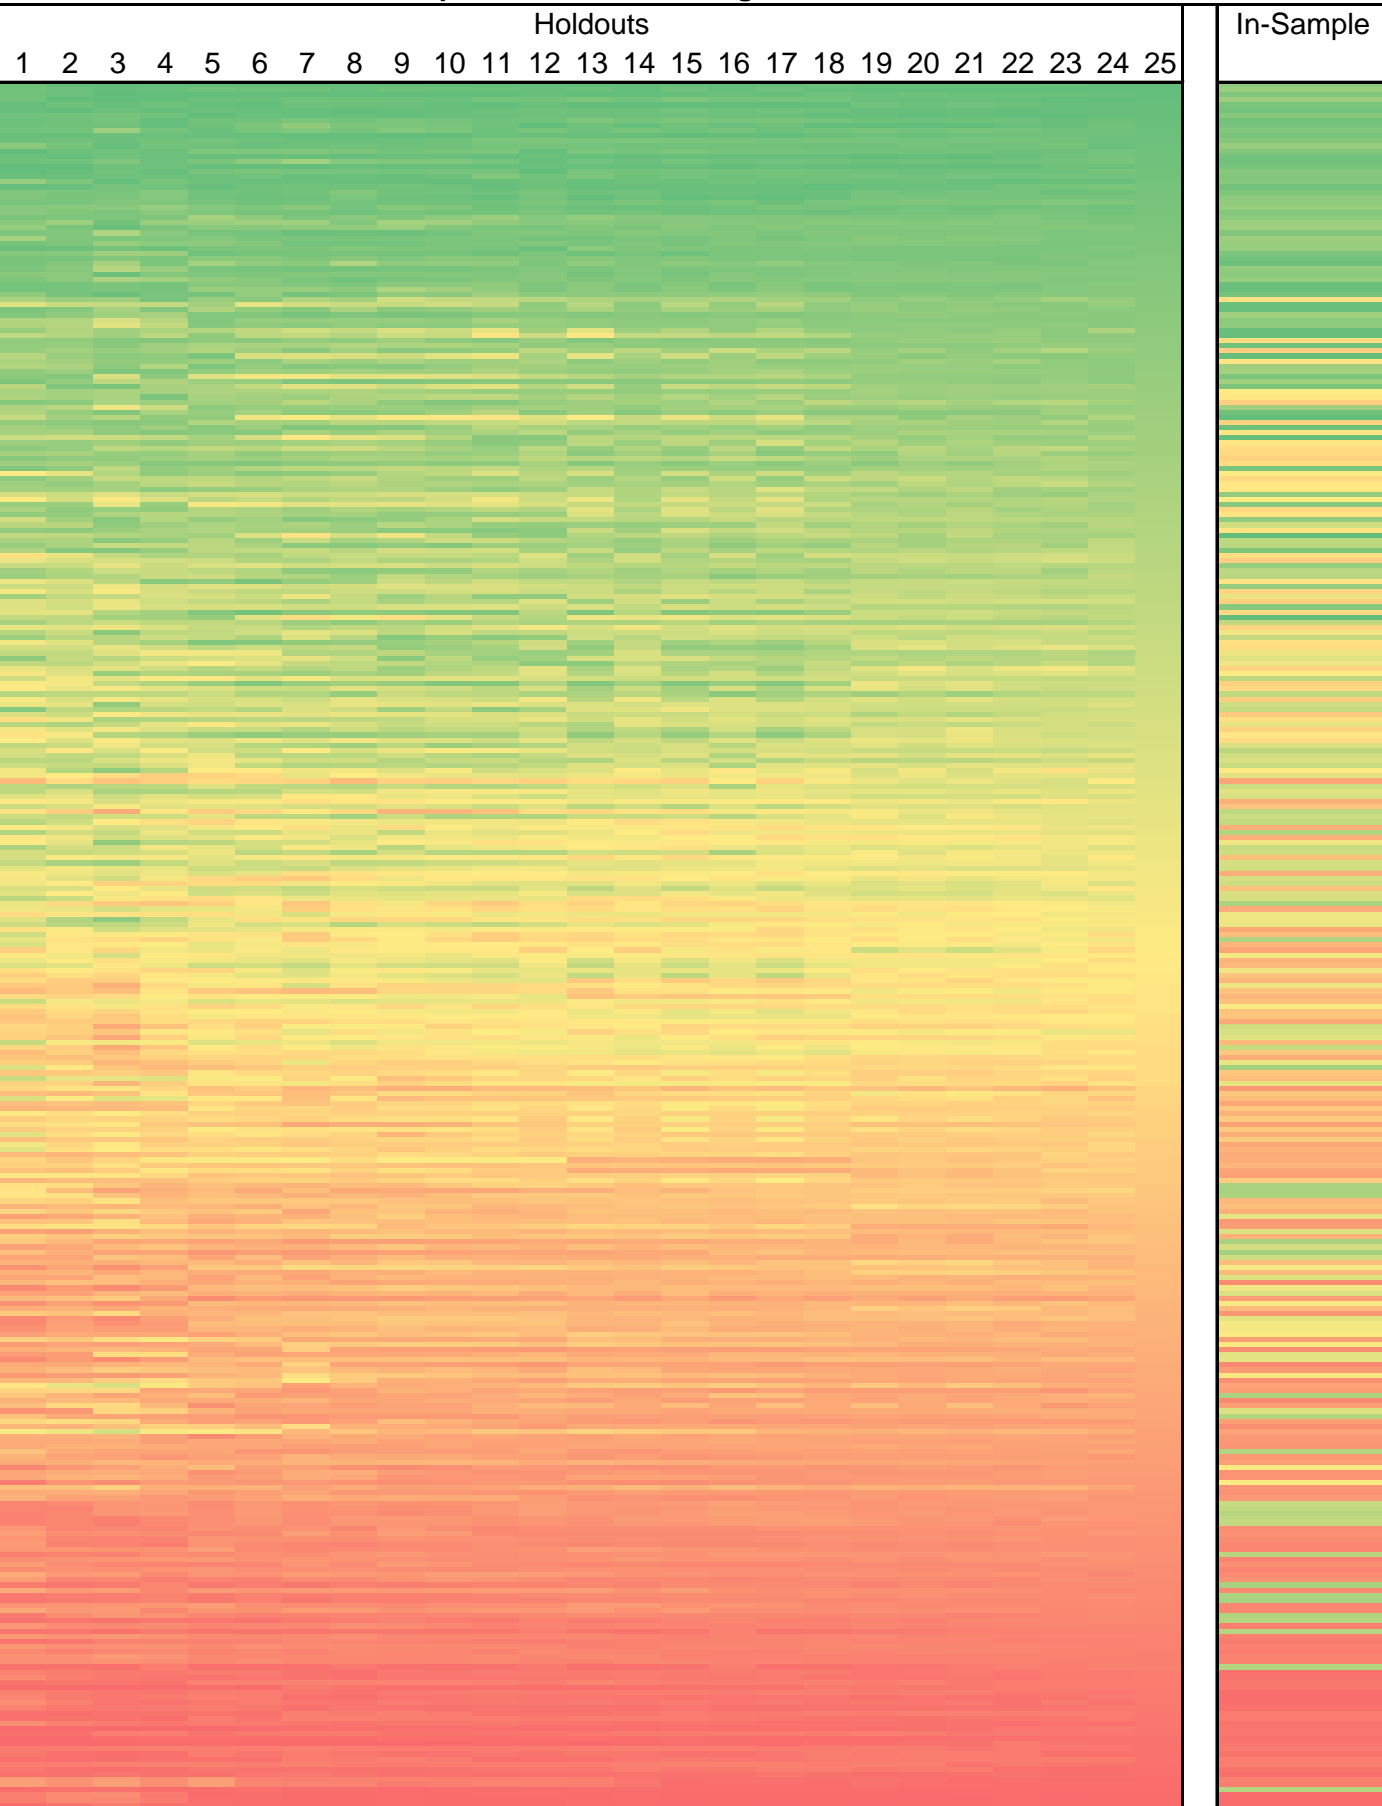

Legend  
= Rank 1    = Rank 169    = Rank 338

Supplement: MOESM4 [file 9572316]
